# Supplementary material for: Evaluation and Validation of the Limited Sampling Strategy of Polymyxin B in Patients with Multidrug-Resistant Gram-Negative Infection
Source: MDPI journal article supplement (doi:10.3390/pharmaceutics14112323), 2022-10-28
Supplement: s1 [file s1]

## Supplementary Material

### 1 Supplementary Figures and Tables

#### 1.1 Supplementary Figures

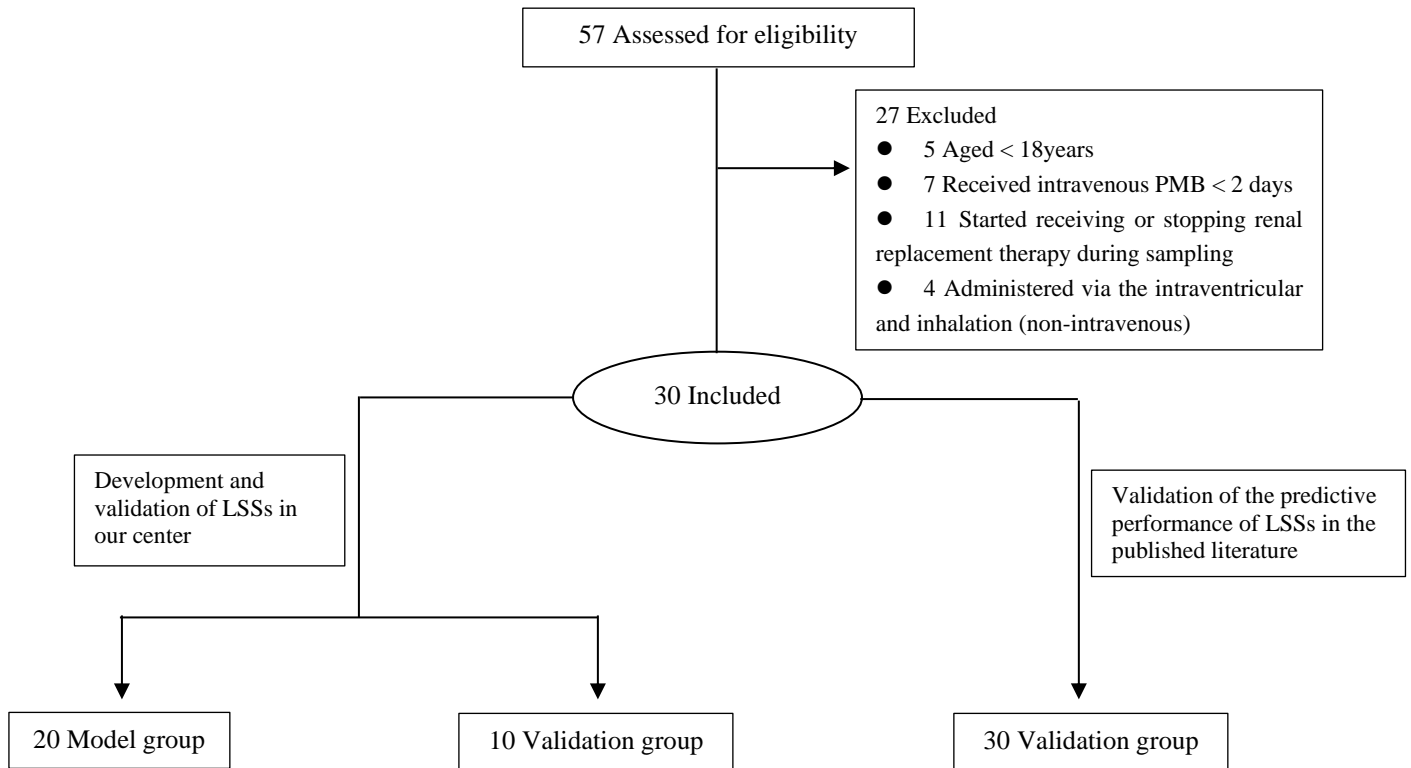

**Figure S1.** Study Flow Diagram.

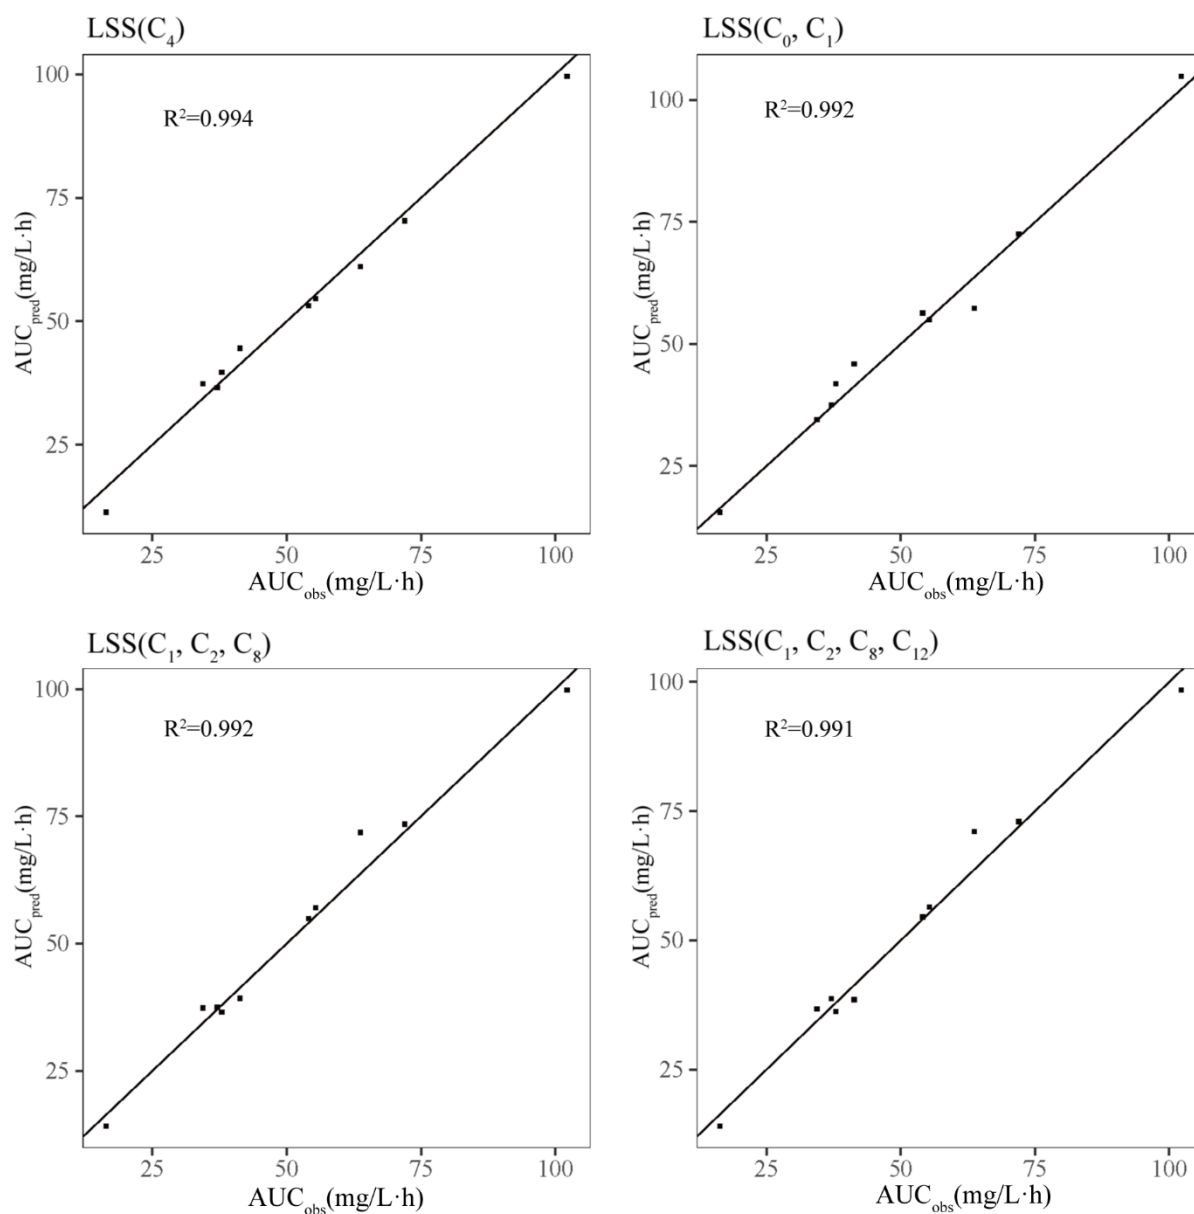

**Figure S2.** Correlation between observed area under the (0-24 h) concentration-time curve ( $AUC_{obs}$ ) and predicted area under the (0-24 h) concentration-time curve ( $AUC_{pred}$ ).  $AUC_{pred}$  were estimated from LSS  $C_4$ , ( $C_0, C_1$ ), ( $C_1, C_2, C_8$ ), and ( $C_1, C_2, C_4, C_8$ ) in Our Center.

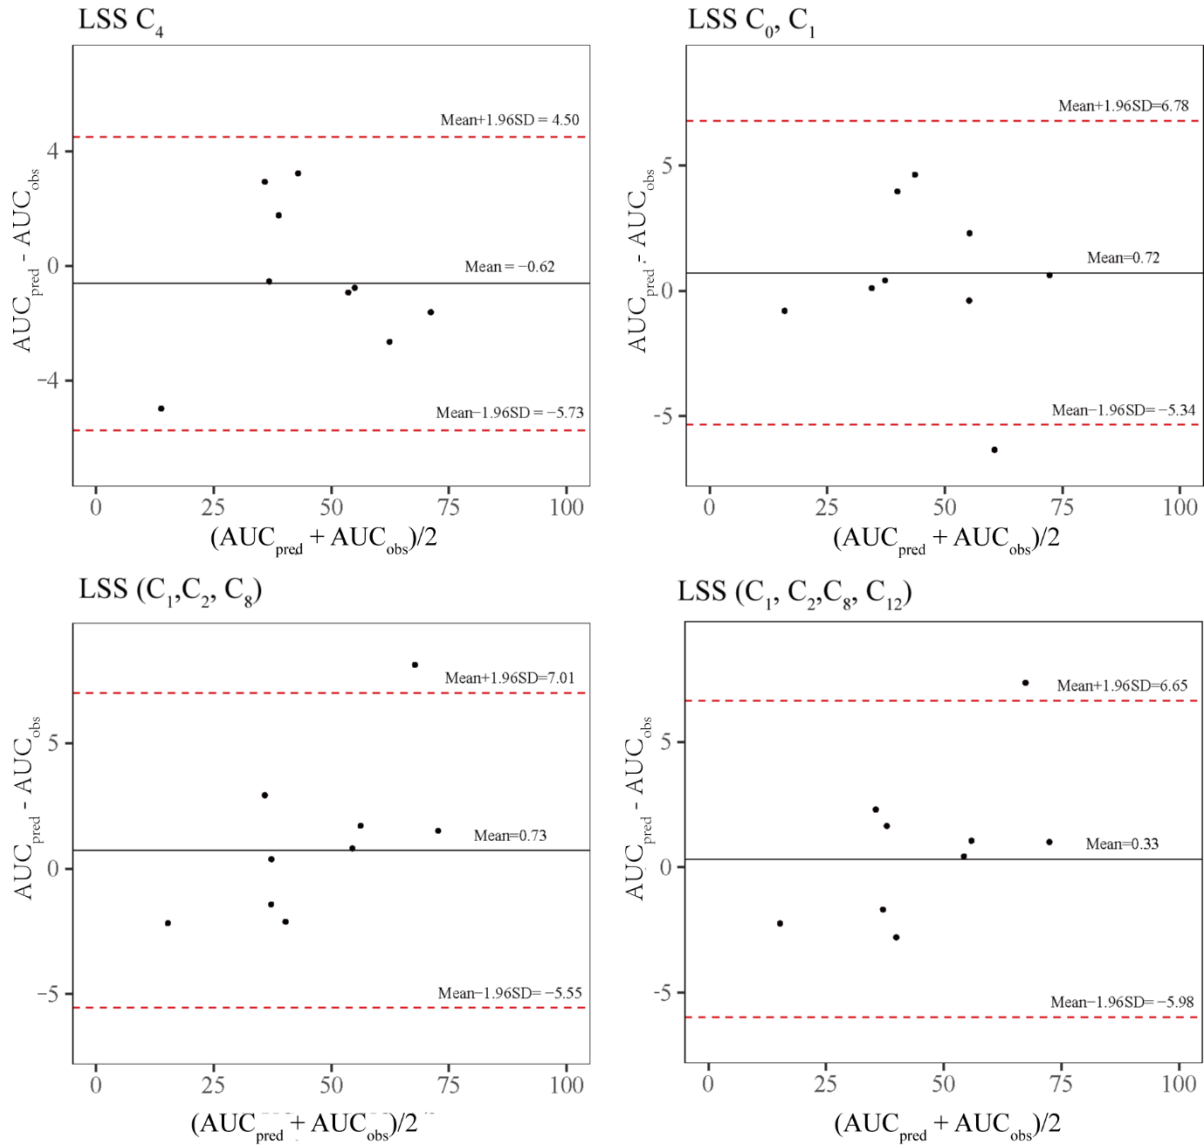

**Figure S3.** Bland-Altman plots of the relative difference between  $AUC_{pred}$  and  $AUC_{obs}$  versus the average of  $AUC_{pred}$  and  $AUC_{obs}$ .  $AUC_{pred}$  were estimated from LSS  $C_4$ ,  $(C_0, C_1)$ ,  $(C_1, C_2, C_8)$ , and  $(C_1, C_2, C_4, C_8)$  in our center.

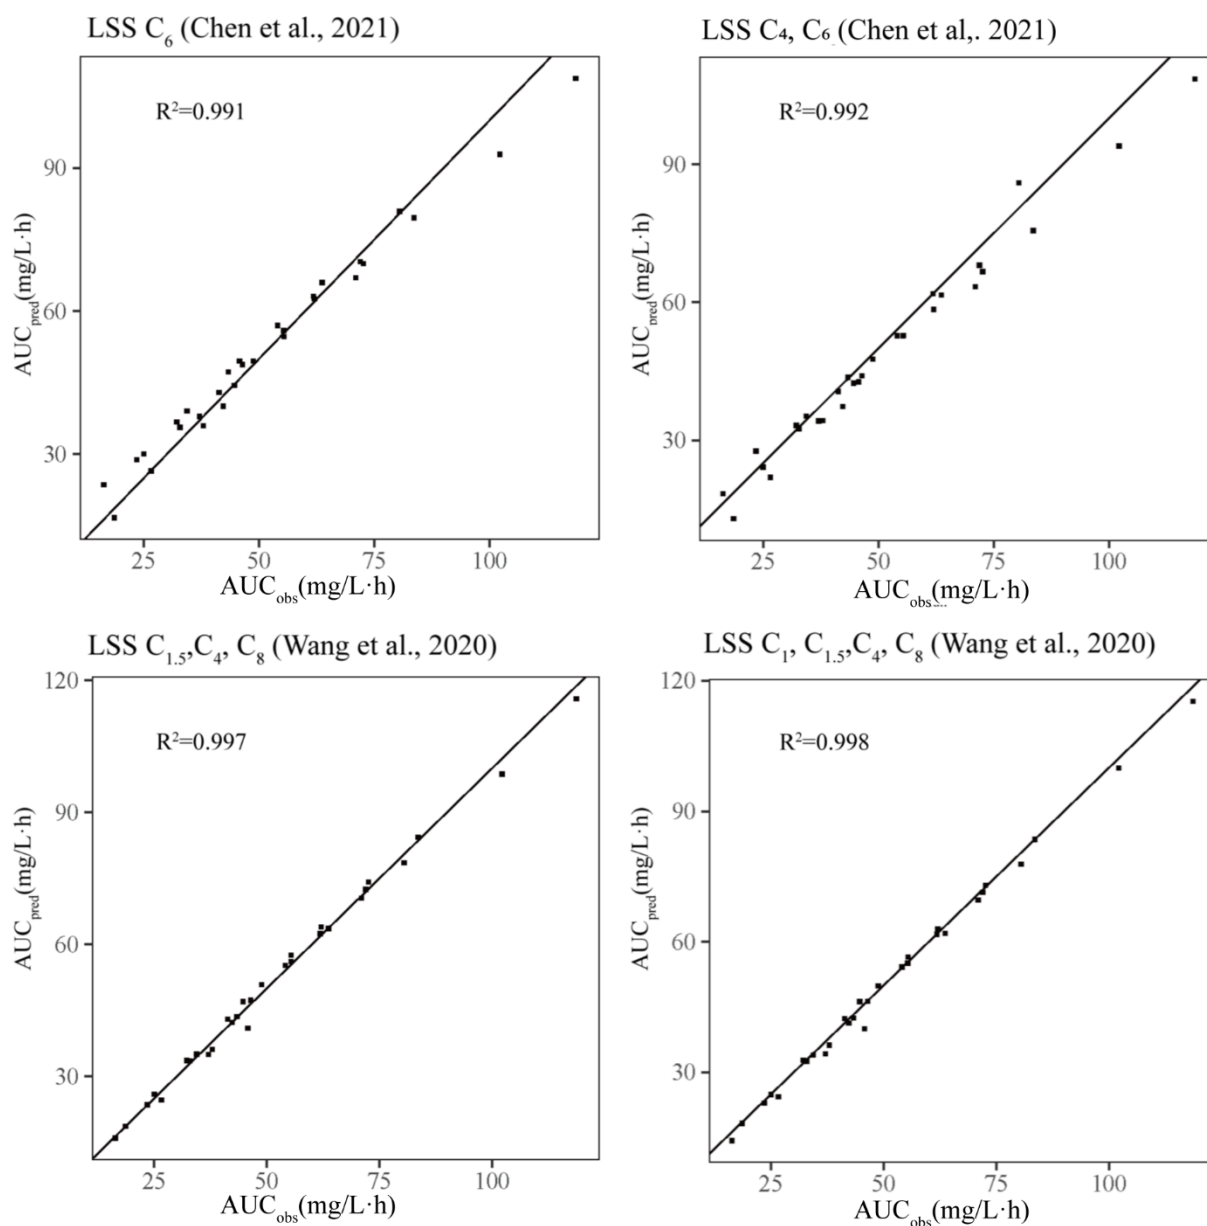

**Figure S4.** Correlation between  $AUC_{obs}$  and  $AUC_{pred}$ .  $AUC_{pred}$  were estimated from LSS  $C_6$  (Chen et al., 2021), LSS  $C_4, C_6$  (Chen et al., 2021), LSS  $C_{1.5}, C_4, C_6, C_8$  (Wang et al., 2020), and LSS  $C_1, C_{1.5}, C_4, C_8$  (Wang et al., 2020).

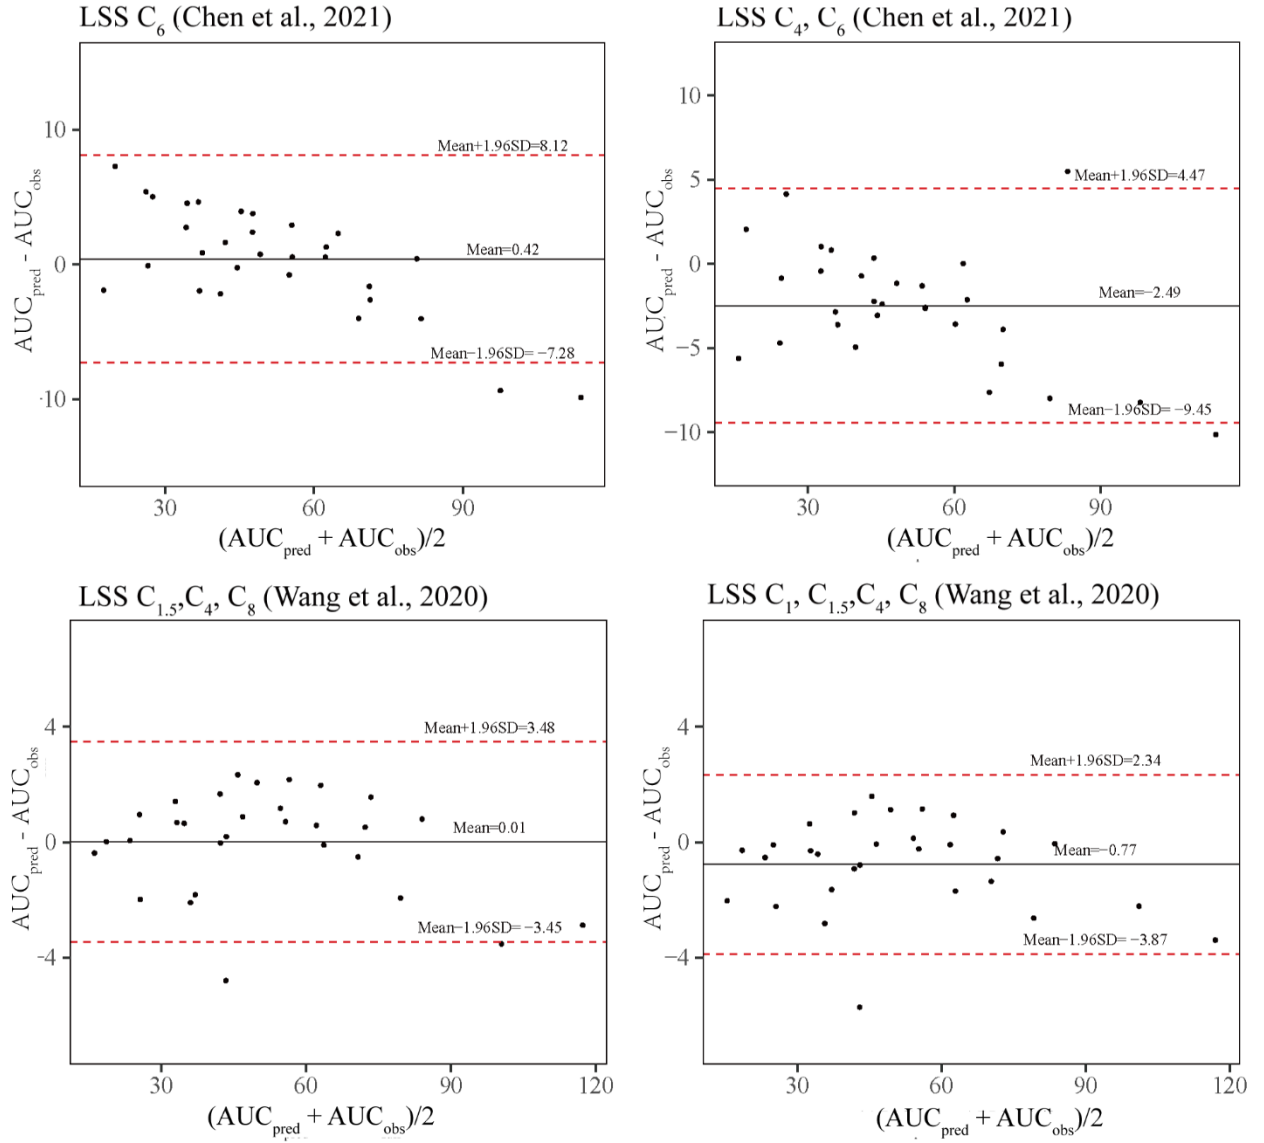

**Figure S5.** Bland-Altman plots of the relative difference between  $AUC_{pred}$  and  $AUC_{obs}$  versus the average of  $AUC_{pred}$  and  $AUC_{obs}$ .  $AUC_{pred}$  were estimated from LSS  $C_6$  (Chen et al., 2021), LSS  $C_4, C_6$  (Chen et al., 2021), LSS  $C_{1.5}, C_4, C_6, C_8$  (Wang et al., 2020), and LSS  $C_1, C_{1.5}, C_4, C_8$  (Wang et al., 2020).

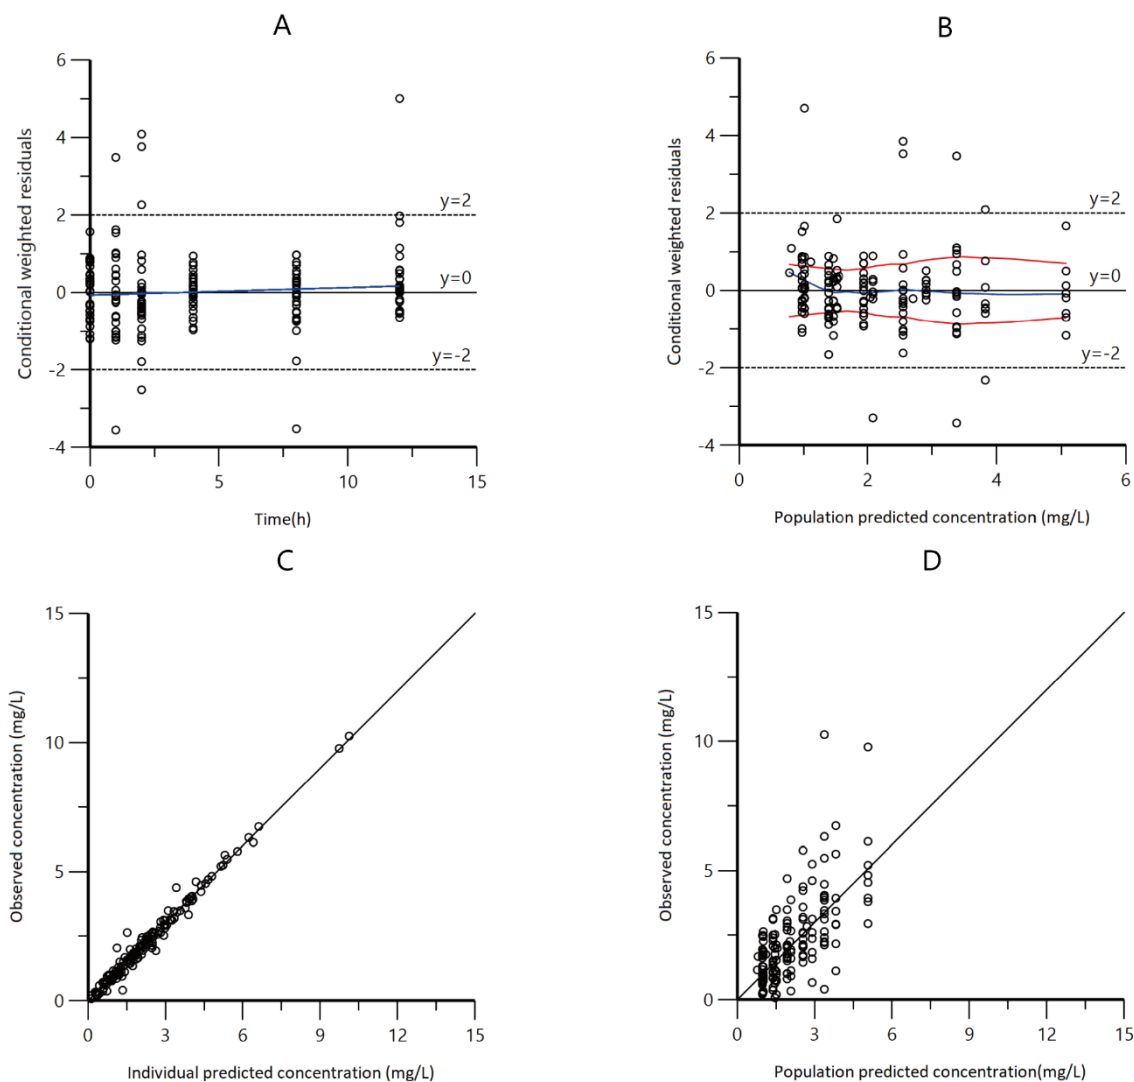

**Figure S6.** Goodness-of-fit plots for the final population pharmacokinetic model. (A) Conditional weighted residuals versus time (CWRES vs. IVAR); (B) Conditional weighted residuals versus population predicted concentrations (CWRES vs. PRED); (C) Observed versus individual predicted concentrations (DV vs. IPRED); (D) Observed versus population predicted concentrations (DV vs. PRED).

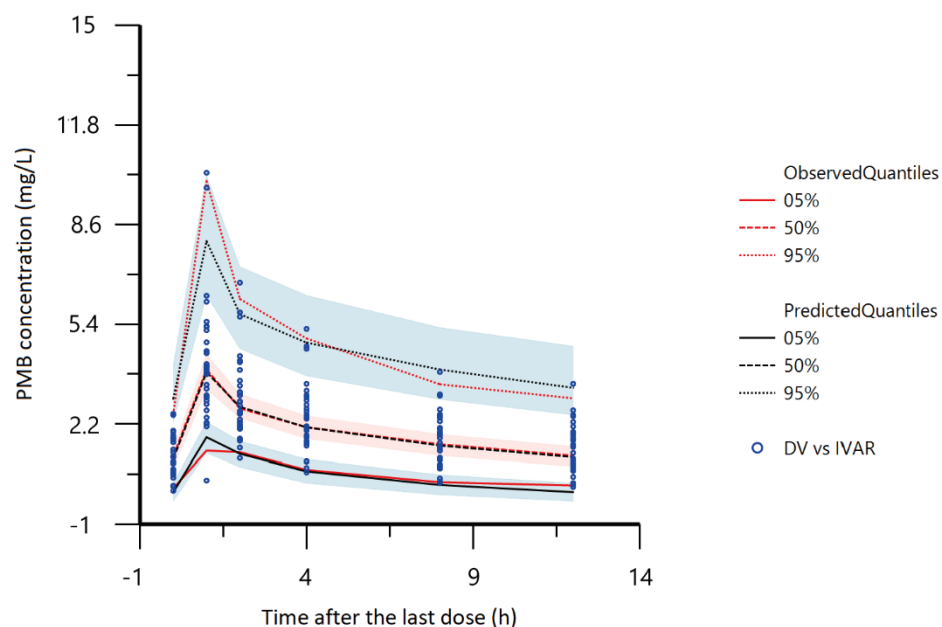

**Figure S7.** Prediction corrected-visual predictive check of the final model. Red lines represent the 5th, 50th, and 95th percentiles of the observed concentration; the shaded areas represent the 90 % confidence intervals of the 5th, 50th, and 95th percentiles of simulated concentrations, respectively; the dots represent the observed data; DV, PMB observed concentration; IVAR, time after the last dose.

## 1.2 Supplementary Tables

**Table S1.** PMB LSSs developed by multiple regression analysis from our center (n= 20)

| No. | Time point                                                        | Equation                                                                                       | r <sup>2</sup> |
|-----|-------------------------------------------------------------------|------------------------------------------------------------------------------------------------|----------------|
| 1   | C <sub>0</sub>                                                    | 34.084×C <sub>0</sub> +10.167                                                                  | 0.874          |
| 2   | C <sub>1</sub>                                                    | 12.062×C <sub>1</sub> +0.745                                                                   | 0.767          |
| 3   | C <sub>2</sub>                                                    | 18.740×C <sub>2</sub> -2.854                                                                   | 0.943          |
| 4   | C <sub>4</sub>                                                    | 20.623×C <sub>4</sub> +2.889                                                                   | 0.935          |
| 5   | C <sub>8</sub>                                                    | 25.549×C <sub>8</sub> +9.340                                                                   | 0.922          |
| 6   | C <sub>12</sub>                                                   | 23.949×C <sub>12</sub> +17.911                                                                 | 0.753          |
| 7   | C <sub>0</sub> , C <sub>1</sub>                                   | 23.006×C <sub>0</sub> +6.037×C <sub>1</sub> -1.853                                             | 0.974          |
| 8   | C <sub>0</sub> , C <sub>2</sub>                                   | 13.469×C <sub>0</sub> +12.633×C <sub>2</sub> -1.440                                            | 0.980          |
| 9   | C <sub>0</sub> , C <sub>4</sub>                                   | 10.919×C <sub>0</sub> +14.758×C <sub>4</sub> +3.463                                            | 0.949          |
| 10  | C <sub>0</sub> , C <sub>8</sub>                                   | 10.011×C <sub>0</sub> +18.674×C <sub>8</sub> +8.538                                            | 0.931          |
| 11  | C <sub>0</sub> , C <sub>12</sub>                                  | 25.592×C <sub>0</sub> +7.633×C <sub>12</sub> +9.740                                            | 0.896          |
| 12  | C <sub>1</sub> , C <sub>2</sub>                                   | -1.840×C <sub>1</sub> +21.118×C <sub>2</sub> -1.990                                            | 0.946          |
| 13  | C <sub>1</sub> , C <sub>4</sub>                                   | 3.356×C <sub>1</sub> +16.334×C <sub>4</sub> -1.142                                             | 0.954          |
| 14  | C <sub>1</sub> , C <sub>8</sub>                                   | 4.531×C <sub>1</sub> +18.758×C <sub>8</sub> +1.446                                             | 0.965          |
| 15  | C <sub>1</sub> , C <sub>12</sub>                                  | 7.422×C <sub>1</sub> +14.235×C <sub>12</sub> +0.247                                            | 0.920          |
| 16  | C <sub>2</sub> , C <sub>4</sub>                                   | 5.635×C <sub>2</sub> +16.137×C <sub>4</sub> -2.060                                             | 0.973          |
| 17  | C <sub>2</sub> , C <sub>8</sub>                                   | 8.661×C <sub>2</sub> +14.564×C <sub>8</sub> +1.740                                             | 0.993          |
| 18  | C <sub>2</sub> , C <sub>12</sub>                                  | 13.614×C <sub>2</sub> +8.942×C <sub>12</sub> -0.910                                            | 0.986          |
| 19  | C <sub>4</sub> , C <sub>8</sub>                                   | 11.538×C <sub>4</sub> +12.818×C <sub>8</sub> +3.134                                            | 0.986          |
| 20  | C <sub>4</sub> , C <sub>12</sub>                                  | 15.604×C <sub>4</sub> +8.476×C <sub>12</sub> +2.801                                            | 0.974          |
| 21  | C <sub>8</sub> , C <sub>12</sub>                                  | 24.469×C <sub>8</sub> +1.253×C <sub>12</sub> +9.362                                            | 0.922          |
| 22  | C <sub>0</sub> , C <sub>1</sub> , C <sub>2</sub>                  | 18.976×C <sub>0</sub> +3.984×C <sub>1</sub> +4.471×C <sub>2</sub> -1.545                       | 0.979          |
| 23  | C <sub>0</sub> , C <sub>1</sub> , C <sub>4</sub>                  | 15.945×C <sub>0</sub> +4.576×C <sub>1</sub> +6.226×C <sub>4</sub> -1.772                       | 0.982          |
| 24  | C <sub>0</sub> , C <sub>1</sub> , C <sub>8</sub>                  | 14.260×C <sub>0</sub> +5.027×C <sub>1</sub> +8.223×C <sub>8</sub> -0.558                       | 0.982          |
| 25  | C <sub>0</sub> , C <sub>1</sub> , C <sub>12</sub>                 | 18.154×C <sub>0</sub> +5.711×C <sub>1</sub> +4.900×C <sub>12</sub> -1.477                      | 0.983          |
| 26  | C <sub>0</sub> , C <sub>2</sub> , C <sub>4</sub>                  | 17.147×C <sub>0</sub> +11.868×C <sub>2</sub> -2.398×C <sub>4</sub> +1.222                      | 0.966          |
| 27  | C <sub>0</sub> , C <sub>2</sub> , C <sub>8</sub>                  | 1.198×C <sub>0</sub> +8.922×C <sub>2</sub> +13.439×C <sub>8</sub> +1.452                       | 0.993          |
| 28  | C <sub>0</sub> , C <sub>2</sub> , C <sub>12</sub>                 | 7.121×C <sub>0</sub> +10.494×C <sub>2</sub> +7.783×C <sub>12</sub> +0.859                      | 0.989          |
| 29  | C <sub>0</sub> , C <sub>4</sub> , C <sub>8</sub>                  | -6.836×C <sub>0</sub> +13.118×C <sub>4</sub> +15.769×C <sub>8</sub> +2.832                     | 0.989          |
| 30  | C <sub>0</sub> , C <sub>4</sub> , C <sub>12</sub>                 | 1.460×C <sub>0</sub> +15.039×C <sub>4</sub> +8.105×C <sub>12</sub> +2.882                      | 0.974          |
| 31  | C <sub>0</sub> , C <sub>8</sub> , C <sub>12</sub>                 | 10.001×C <sub>0</sub> +17.623×C <sub>8</sub> +1.226×C <sub>12</sub> +8.561                     | 0.931          |
| 32  | C <sub>1</sub> , C <sub>2</sub> , C <sub>4</sub>                  | 5.805×C <sub>1</sub> -10.295×C <sub>2</sub> +25.295×C <sub>4</sub> -1.837                      | 0.960          |
| 33  | C <sub>1</sub> , C <sub>2</sub> , C <sub>8</sub>                  | 0.600×C <sub>1</sub> +8.356×C <sub>2</sub> +14.078×C <sub>8</sub> +0.997                       | 0.993          |
| 34  | C <sub>1</sub> , C <sub>2</sub> , C <sub>12</sub>                 | 0.776×C <sub>1</sub> +11.400×C <sub>2</sub> +10.303×C <sub>12</sub> +0.01                      | 0.983          |
| 35  | C <sub>1</sub> , C <sub>4</sub> , C <sub>8</sub>                  | 2.479×C <sub>1</sub> +9.081×C <sub>4</sub> +11.814×C <sub>8</sub> +0.137                       | 0.996          |
| 36  | C <sub>1</sub> , C <sub>4</sub> , C <sub>12</sub>                 | 3.091×C <sub>1</sub> +11.838×C <sub>4</sub> +8.165×C <sub>12</sub> -0.908                      | 0.990          |
| 37  | C <sub>1</sub> , C <sub>8</sub> , C <sub>12</sub>                 | 4.691×C <sub>1</sub> +15.801×C <sub>8</sub> +15.801×C <sub>12</sub> +1.225                     | 0.968          |
| 38  | C <sub>2</sub> , C <sub>4</sub> , C <sub>8</sub>                  | 7.198×C <sub>2</sub> +2.722×C <sub>4</sub> +13.439×C <sub>8</sub> +1.589                       | 0.994          |
| 39  | C <sub>2</sub> , C <sub>4</sub> , C <sub>12</sub>                 | 8.611×C <sub>2</sub> +5.015×C <sub>4</sub> +9.436×C <sub>12</sub> +0.928                       | 0.985          |
| 40  | C <sub>2</sub> , C <sub>8</sub> , C <sub>12</sub>                 | 9.472×C <sub>2</sub> +9.806×C <sub>8</sub> +4.359×C <sub>12</sub> +1.146                       | 0.998          |
| 41  | C <sub>4</sub> , C <sub>8</sub> , C <sub>12</sub>                 | 11.811×C <sub>4</sub> +9.817×C <sub>8</sub> +3.132×C <sub>12</sub> +3.044                      | 0.988          |
| 42  | C <sub>0</sub> , C <sub>1</sub> , C <sub>2</sub> , C <sub>4</sub> | 15.333×C <sub>0</sub> +5.002×C <sub>1</sub> -1.997×C <sub>2</sub> +8.318×C <sub>4</sub> -1.882 | 0.982          |



Table S1. (Continued)

| No. | Time point                                                         | Equation                                                                                  | r <sup>2</sup> |
|-----|--------------------------------------------------------------------|-------------------------------------------------------------------------------------------|----------------|
| 43  | C <sub>0</sub> , C <sub>1</sub> , C <sub>2</sub> , C <sub>8</sub>  | $4.048 \times C_0 + 1.306 \times C_1 + 7.154 \times C_2 + 11.761 \times C_8 + 0.493$      | 0.994          |
| 44  | C <sub>0</sub> , C <sub>1</sub> , C <sub>2</sub> , C <sub>12</sub> | $10.511 \times C_0 + 2.525 \times C_1 + 6.700 \times C_2 + 6.520 \times C_{12} - 0.890$   | 0.994          |
| 45  | C <sub>0</sub> , C <sub>1</sub> , C <sub>4</sub> , C <sub>8</sub>  | $0.952 \times C_0 + 2.586 \times C_1 + 8.756 \times C_4 + 11.360 \times C_8 + 0.5$        | 0.996          |
| 46  | C <sub>0</sub> , C <sub>1</sub> , C <sub>4</sub> , C <sub>12</sub> | $7.936 \times C_0 + 3.767 \times C_1 + 7.946 \times C_4 + 6.08 \times C_{12} - 1.282$     | 0.995          |
| 47  | C <sub>0</sub> , C <sub>1</sub> , C <sub>8</sub> , C <sub>12</sub> | $14.379 \times C_0 + 5.199 \times C_1 + 5.02 \times C_8 + 3.320 \times C_{12} - 0.808$    | 0.985          |
| 48  | C <sub>0</sub> , C <sub>2</sub> , C <sub>4</sub> , C <sub>8</sub>  | $-1.179 \times C_0 + 6.798 \times C_2 + 3.485 \times C_4 + 13.914 \times C_8 + 1.623$     | 0.994          |
| 49  | C <sub>0</sub> , C <sub>2</sub> , C <sub>4</sub> , C <sub>12</sub> | $7.684 \times C_0 + 11.091 \times C_2 - 1.006 \times C_4 + 7.760 \times C_{12} + 0.813$   | 0.989          |
| 50  | C <sub>0</sub> , C <sub>2</sub> , C <sub>8</sub> , C <sub>12</sub> | $0.688 \times C_0 + 9.402 \times C_2 + 9.443 \times C_8 + 4.334 \times C_{12} + 1.151$    | 0.998          |
| 51  | C <sub>0</sub> , C <sub>4</sub> , C <sub>8</sub> , C <sub>12</sub> | $-7.422 \times C_0 + 13.553 \times C_4 + 12.736 \times C_8 + 3.428 \times C_{12} + 2.707$ | 0.992          |
| 52  | C <sub>1</sub> , C <sub>2</sub> , C <sub>4</sub> , C <sub>8</sub>  | $2.151 \times C_1 + 1.313 \times C_2 + 7.799 \times C_4 + 12.060 \times C_8 + 0.252$      | 0.996          |
| 53  | C <sub>1</sub> , C <sub>2</sub> , C <sub>4</sub> , C <sub>12</sub> | $3.094 \times C_1 - 0.14 \times C_2 + 11.851 \times C_4 + 8.163 \times C_{12} - 0.909$    | 0.990          |
| 54  | C <sub>1</sub> , C <sub>2</sub> , C <sub>8</sub> , C <sub>12</sub> | $0.637 \times C_1 + 8.749 \times C_2 + 9.749 \times C_8 + 4.380 \times C_{12} + 0.669$    | 0.998          |
| 55  | C <sub>1</sub> , C <sub>4</sub> , C <sub>8</sub> , C <sub>12</sub> | $2.630 \times C_1 + 9.262 \times C_4 + 8.118 \times C_8 + 3.791 \times C_{12} - 0.154$    | 0.999          |
| 56  | C <sub>2</sub> , C <sub>4</sub> , C <sub>8</sub> , C <sub>12</sub> | $8.194 \times C_2 + 1.871 \times C_4 + 9.463 \times C_8 + 4.238 \times C_{12} + 1.253$    | 0.998          |

**Table S2.** Predictive performance of selected PMB LSSs developed by MLR analysis from our center

| No. | Time point                                                         | Equation                                                                               | MPE % | RMSE % | R     | F <sub>15</sub> % |
|-----|--------------------------------------------------------------------|----------------------------------------------------------------------------------------|-------|--------|-------|-------------------|
| 1   | C <sub>0</sub>                                                     | $34.084 \times C_0 + 10.167$                                                           | 3.08  | 19.20  | 0.876 | 50.00             |
| 2   | C <sub>1</sub>                                                     | $12.062 \times C_1 + 0.745$                                                            | 8.12  | 35.49  | 0.823 | 30.00             |
| 3   | C <sub>2</sub>                                                     | $18.740 \times C_2 - 2.854$                                                            | 5.09  | 16.82  | 0.968 | 50.00             |
| *4  | C <sub>4</sub>                                                     | $20.623 \times C_4 + 2.889$                                                            | -2.31 | 10.60  | 0.994 | 90.00             |
| 5   | C <sub>8</sub>                                                     | $25.549 \times C_8 + 9.340$                                                            | 0.38  | 11.96  | 0.966 | 80.00             |
| *6  | C <sub>0</sub> , C <sub>1</sub>                                    | $23.006 \times C_0 + 6.037 \times C_1 - 1.853$                                         | 1.53  | 6.21   | 0.992 | 100.00            |
| 7   | C <sub>0</sub> , C <sub>2</sub>                                    | $13.469 \times C_0 + 12.633 \times C_2 - 1.440$                                        | 2.96  | 13.68  | 0.976 | 70.00             |
| 8   | C <sub>2</sub> , C <sub>8</sub>                                    | $8.661 \times C_2 + 14.564 \times C_8 + 1.740$                                         | 0.27  | 7.95   | 0.987 | 100.00            |
| 9   | C <sub>2</sub> , C <sub>12</sub>                                   | $13.614 \times C_2 + 8.942 \times C_{12} - 0.910$                                      | 0.92  | 11.15  | 0.980 | 70.00             |
| 10  | C <sub>4</sub> , C <sub>8</sub>                                    | $11.538 \times C_4 + 12.818 \times C_8 + 3.134$                                        | -2.71 | 9.41   | 0.992 | 90.00             |
| 11  | C <sub>0</sub> , C <sub>2</sub> , C <sub>8</sub>                   | $1.198 \times C_0 + 8.922 \times C_2 + 13.439 \times C_8 + 1.452$                      | 0.46  | 8.40   | 0.986 | 80.00             |
| *12 | C <sub>1</sub> , C <sub>2</sub> , C <sub>8</sub>                   | $0.600 \times C_1 + 8.356 \times C_2 + 14.078 \times C_8 + 0.997$                      | 0.44  | 6.90   | 0.992 | 100.00            |
| 13  | C <sub>1</sub> , C <sub>4</sub> , C <sub>8</sub>                   | $2.479 \times C_1 + 9.081 \times C_4 + 11.814 \times C_8 + 0.137$                      | -2.02 | 6.51   | 0.998 | 90.00             |
| 14  | C <sub>2</sub> , C <sub>4</sub> , C <sub>8</sub>                   | $7.198 \times C_2 + 2.722 \times C_4 + 13.439 \times C_8 + 1.589$                      | -0.30 | 8.06   | 0.990 | 90.00             |
| 15  | C <sub>2</sub> , C <sub>8</sub> , C <sub>12</sub>                  | $9.472 \times C_2 + 9.806 \times C_8 + 4.359 \times C_{12} + 1.146$                    | -0.19 | 8.19   | 0.986 | 90.00             |
| 16  | C <sub>0</sub> , C <sub>1</sub> , C <sub>4</sub> , C <sub>8</sub>  | $0.952 \times C_0 + 2.586 \times C_1 + 8.756 \times C_4 + 11.360 \times C_8 + 0.5$     | -0.81 | 5.73   | 0.998 | 90.00             |
| 17  | C <sub>0</sub> , C <sub>2</sub> , C <sub>8</sub> , C <sub>12</sub> | $0.688 \times C_0 + 9.402 \times C_2 + 9.443 \times C_8 + 4.334 \times C_{12} + 1.151$ | -0.18 | 8.30   | 0.985 | 90.00             |
| *18 | C <sub>1</sub> , C <sub>2</sub> , C <sub>8</sub> , C <sub>12</sub> | $0.637 \times C_1 + 8.749 \times C_2 + 9.749 \times C_8 + 4.380 \times C_{12} + 0.669$ | -0.18 | 6.87   | 0.991 | 100.00            |
| 19  | C <sub>1</sub> , C <sub>4</sub> , C <sub>8</sub> , C <sub>12</sub> | $2.630 \times C_1 + 9.262 \times C_4 + 8.118 \times C_8 + 3.791 \times C_{12} - 0.154$ | -2.61 | 6.50   | 0.998 | 90.00             |
| 20  | C <sub>2</sub> , C <sub>4</sub> , C <sub>8</sub> , C <sub>12</sub> | $8.194 \times C_2 + 1.871 \times C_4 + 9.463 \times C_8 + 4.238 \times C_{12} + 1.253$ | -0.68 | 8.03   | 0.988 | 90.00             |

MPE, mean prediction error; RMSE, root mean squared prediction error; R, the Pearson correlation coefficient between AUC<sub>pred</sub> and AUC<sub>obs</sub>; F<sub>15</sub>, the percentage of prediction error falling within the  $\pm 15$  %.

\*Equation with the best predictability within the same numbers of concentration-time points.

**Table S3.** A summary of the published PMB LSS studies.

|                     | Country<br>(single/multiple sites) | Diagnosis,<br>number of<br>patients                        | Age, year               | Weight, kg | Daily dose,<br>mg | Infusion<br>duration<br>range, h | Dose<br>frequency | Bioassay                                         | sampling                                                                                                                                    | LSS validation                                                 |
|---------------------|------------------------------------|------------------------------------------------------------|-------------------------|------------|-------------------|----------------------------------|-------------------|--------------------------------------------------|---------------------------------------------------------------------------------------------------------------------------------------------|----------------------------------------------------------------|
| (Wang et al., 2020) | China(single)                      | Multidrug-resistant Gram-negative bacterial infections, 37 | 46 (18-94) <sup>a</sup> | 70 (45-98) | 100-200           | 1                                | q12h              | LC-MS/MS, B1+B2, LLQ:0.2 mg/L, % CV: 13.9 %      | C <sub>0</sub> , C <sub>0.5</sub> , C <sub>1</sub> , C <sub>1.5</sub> , C <sub>2</sub> , C <sub>4</sub> , C <sub>6</sub> and C <sub>8</sub> | Yes, Jackknife method (internal validation)                    |
| (Chen et al., 2021) | China(single)                      | severe pneumonia, 24                                       | 63 ±19 <sup>b</sup>     | 66.1±15.3  | 100               | 1                                | q12h              | UPLC-MS/MS, B1+B2+B3, LLQ: 0.469 mg/L, % CV: 6 % | C <sub>0</sub> , C <sub>1.5</sub> , C <sub>2</sub> , C <sub>4</sub> , C <sub>6</sub> , C <sub>8</sub> and C <sub>12</sub>                   | Yes, validation in 10 different patients (internal validation) |

Abbreviations: q12h, every 12 h; LC-MS/MS, liquid chromatography-tandem mass spectrometry; UPLC-MS/MS, ultra-performance liquid chromatography-tandem mass spectrometry; B1, polymyxin B1; B2, polymyxin B2; LLOQ, lower limit of quantification; % CV, percentage coefficient of variation.

<sup>a</sup> Data represent the median (range).

<sup>b</sup> Data represent the mean ± standard deviation (range).

**Table S4.** The predictive performance of MLR-based PMB LSSs available in the literature for estimation of PMB AUC<sub>pred</sub> in patients with MDR Gram-negative bacteria infection treated with PMB.

| No. | Time point                                                          | Equation                                                                    | Reference         | MPE %  | RMSE % | R     | F <sub>15</sub> % |
|-----|---------------------------------------------------------------------|-----------------------------------------------------------------------------|-------------------|--------|--------|-------|-------------------|
| 1   | C <sub>0</sub>                                                      | $21.323+28.189\times C_0$                                                   | [21] <sup>a</sup> | 15.53  | 28.28  | 0.917 | 43.33             |
| 2   | C <sub>2</sub>                                                      | $-2.099+8.763\times C_2$                                                    | [22] <sup>b</sup> | -2.04  | 22.35  | 0.949 | 53.33             |
| 3   | C <sub>4</sub>                                                      | $0.533+9.876\times C_4$                                                     | [22]              | -6.64  | 12.54  | 0.976 | 76.67             |
| 4   | C <sub>4</sub>                                                      | $-5.601+21.479\times C_4$                                                   | [21]              | -14.77 | 19.76  | 0.976 | 56.67             |
| *5  | C <sub>6</sub>                                                      | $8.147+21.961\times C_6$                                                    | [21]              | 3.71   | 11.57  | 0.993 | 90.00             |
| 6   | C <sub>8</sub>                                                      | $16.168+25.222\times C_8$                                                   | [21]              | 15.98  | 22.09  | 0.962 | 46.67             |
| 7   | C <sub>12</sub>                                                     | $17.198+30.214\times C_{12}$                                                | [21]              | 17.98  | 31.86  | 0.875 | 43.33             |
| 8   | C <sub>0</sub> , C <sub>1</sub>                                     | $6.811+20.569\times C_0+5.030\times C_1$                                    | [21]              | 6.18   | 15.36  | 0.986 | 73.33             |
| 9   | C <sub>0</sub> , C <sub>1.5</sub>                                   | $9.349+20.195\times C_0+5.344\times C_{1.5}$                                | [21]              | 6.04   | 14.36  | 0.980 | 73.33             |
| 10  | C <sub>0</sub> , C <sub>2</sub>                                     | $-0.673+6.048\times C_0+6.203\times C_2$                                    | [22]              | 0.78   | 15.19  | 0.976 | 76.67             |
| 11  | C <sub>0</sub> , C <sub>2</sub>                                     | $3.119+14.215\times C_0+10.228\times C_2$                                   | [21]              | -2.52  | 11.22  | 0.978 | 83.33             |
| 12  | C <sub>0</sub> , C <sub>4</sub>                                     | $1.608+4.574\times C_0+7.602\times C_4$                                     | [22]              | -1.55  | 11.36  | 0.979 | 90.00             |
| 13  | C <sub>0</sub> , C <sub>4</sub>                                     | $-0.717+7.805\times C_0+16.225\times C_4$                                   | [21]              | -9.39  | 14.87  | 0.979 | 73.33             |
| 14  | C <sub>0</sub> , C <sub>6</sub>                                     | $9.303+5.384\times C_0+18.220\times C_6$                                    | [21]              | 4.42   | 12.68  | 0.988 | 83.33             |
| 15  | C <sub>2</sub> , C <sub>8</sub>                                     | $-0.274+4.671\times C_2+7.181\times C_8$                                    | [22]              | 0.14   | 10.78  | 0.991 | 86.67             |
| *16 | C <sub>4</sub> , C <sub>6</sub>                                     | $2.030+8.532\times C_4+13.465\times C_6$                                    | [21]              | -4.34  | 9.48   | 0.991 | 90.00             |
| 17  | C <sub>4</sub> , C <sub>8</sub>                                     | $0.196+13.903\times C_4+9.725\times C_8$                                    | [21]              | -5.93  | 10.24  | 0.993 | 86.67             |
| 18  | C <sub>4</sub> , C <sub>12</sub>                                    | $0.546+14.120\times C_4+11.235\times C_{12}$                                | [21]              | -5.33  | 11.42  | 0.987 | 83.33             |
| 19  | C <sub>1</sub> , C <sub>4</sub> , C <sub>8</sub>                    | $0.523+0.882\times C_1+4.697\times C_4+6.099\times C_8$                     | [22]              | -1.99  | 4.68   | 0.998 | 96.67             |
| *20 | C <sub>1.5</sub> , C <sub>4</sub> , C <sub>8</sub>                  | $0.599+1.964\times C_{1.5}+3.169\times C_4+6.633\times C_8$                 | [22]              | 0.13   | 3.63   | 0.997 | 100.0             |
| 21  | C <sub>0</sub> , C <sub>4</sub> , C <sub>6</sub>                    | $3.467+4.853\times C_0+7.980\times C_4+10.635\times C_6$                    | [21]              | -3.21  | 9.84   | 0.988 | 90.00             |
| 22  | C <sub>0</sub> , C <sub>6</sub> , C <sub>8</sub>                    | $7.641+4.158\times C_0+20.045\times C_6-0.526\times C_8$                    | [21]              | 3.01   | 11.32  | 0.990 | 83.33             |
| 23  | C <sub>4</sub> , C <sub>6</sub> , C <sub>12</sub>                   | $2.559+9.518\times C_4+7.739\times C_6+6.894\times C_{12}$                  | [21]              | -3.00  | 9.16   | 0.991 | 93.33             |
| *24 | C <sub>1</sub> , C <sub>1.5</sub> , C <sub>4</sub> , C <sub>8</sub> | $0.260+0.460\times C_1+1.137\times C_{1.5}+3.644\times C_4+6.480\times C_8$ | [22]              | -1.84  | 4.26   | 0.998 | 100.0             |
| 25  | C <sub>0</sub> , C <sub>4</sub> , C <sub>6</sub> , C <sub>8</sub>   | $2.879+3.489\times C_0+7.637\times C_4+10.691\times C_6+1.914\times C_8$    | [21]              | -3.25  | 9.27   | 0.991 | 90.00             |
| 26  | C <sub>0</sub> , C <sub>4</sub> , C <sub>6</sub> , C <sub>12</sub>  | $3.439+3.541\times C_0+8.801\times C_4+7.503\times C_6+4.696\times C_{12}$  | [21]              | -2.59  | 9.30   | 0.990 | 90.00             |

MPE, mean prediction error; RMSE, root mean squared prediction error; R, the Pearson correlation coefficient between AUC<sub>pred</sub> and AUC<sub>obs</sub>; F<sub>15</sub>, the percentage of prediction error falling within the  $\pm 15$  %.

\*Model with the best predictability within the same numbers of concentration-time points.

<sup>a</sup> Prediction of AUC<sub>ss,24hr</sub>.

<sup>b</sup> Prediction of AUC<sub>ss,12hr</sub>.

**Table S5.** Population PK parameters estimates in the final model and bootstrap

| Parameters                        | Final model results |      |       |             |               | Bootstrap |      |       |            |
|-----------------------------------|---------------------|------|-------|-------------|---------------|-----------|------|-------|------------|
|                                   | Estimate            | SE   | % CV  | 95 % CI     | Shrinkage (%) | Estimate  | SE   | % CV  | 95 % CI    |
| tvV (L)                           | 15.6                | 3.6  | 23.10 | 11.89-19.23 | NA            | 15.78     | 2.54 | 16.09 | 9.64-18.02 |
| tvV <sub>2</sub> (L)              | 11.8                | 2.82 | 23.89 | 8.10-15.53  | NA            | 11.26     | 3.92 | 34.77 | 9.01-22.59 |
| tvCL (L/h)                        | 2.29                | 0.22 | 9.66  | 1.85-2.72   | NA            | 2.27      | 0.21 | 9.06  | 1.89-2.54  |
| tvCL <sub>2</sub> (L/h)           | 6.81                | 1.59 | 23.39 | 3.67-9.95   | NA            | 6.64      | 1.37 | 20.63 | 5.57-7.59  |
| Inter-individual variability      |                     |      |       |             |               |           |      |       |            |
| $\omega^2V$                       | 0.14                | 0.11 | 29.73 | NA          | 5.68          | 0.08      | 0.05 | 17.86 | NA         |
| $\omega^2V_2$                     | 0.11                | 0.13 | 39.39 | NA          | 3.30          | 0.01      | 0.05 | 47.01 | NA         |
| $\omega^2CL$                      | 0.07                | 0.06 | 22.22 | NA          | 39.91         | 0.03      | 0.04 | 22.22 | NA         |
| $\omega^2CL_2$                    | 0.29                | 0.05 | 17.24 | NA          | 41.12         | 0.31      | 0.07 | 22.58 | NA         |
| Residual variability ( $\sigma$ ) |                     |      |       |             |               |           |      |       |            |
| Proportional error                | 0.28                | 0.05 | 16.59 | 0.19-0.37   | 26.1          | 0.28      | 0.04 | 14.43 | 0.20-0.33  |

SE, standard error; CV, percent confidence of variation; CI, confidence interval; tvV, typical value of volume of central compartment distribution (V); tvV<sub>2</sub>, typical value of volume of peripheral compartment distribution (V<sub>2</sub>); tvCL, typical value of central compartment clearance (CL); tvCL<sub>2</sub>, typical value of inter-compartmental clearance (CL<sub>2</sub>);  $\omega$ , interindividual variation; NA, not applicable.

**Table S6.** Individual pharmacokinetic parameter estimates

| ID | V (L) | V <sub>2</sub> (L) | Cl (L/h) | Cl <sub>2</sub> (L/h) |
|----|-------|--------------------|----------|-----------------------|
| 1  | 16.31 | 14.15              | 2.37     | 7.01                  |
| 2  | 25.53 | 11.21              | 2.14     | 6.80                  |
| 3  | 7.06  | 10.48              | 1.22     | 6.47                  |
| 4  | 8.38  | 15.16              | 1.05     | 6.99                  |
| 5  | 9.75  | 18.32              | 1.26     | 7.01                  |
| 6  | 12.85 | 14.20              | 3.57     | 6.83                  |
| 7  | 20.74 | 11.32              | 3.07     | 6.87                  |
| 8  | 17.13 | 10.41              | 2.73     | 6.84                  |
| 9  | 21.78 | 13.05              | 1.54     | 6.86                  |
| 10 | 11.32 | 16.44              | 8.54     | 7.01                  |
| 11 | 18.28 | 12.47              | 1.46     | 6.89                  |
| 12 | 2.68  | 6.72               | 0.98     | 6.25                  |
| 13 | 6.74  | 10.58              | 3.64     | 6.56                  |
| 14 | 25.23 | 10.57              | 2.78     | 6.78                  |
| 15 | 25.77 | 12.58              | 4.51     | 6.85                  |
| 16 | 45.15 | 10.25              | 5.63     | 6.78                  |
| 17 | 12.12 | 3.44               | 1.82     | 6.99                  |
| 18 | 16.73 | 10.22              | 1.50     | 6.87                  |
| 19 | 18.82 | 6.09               | 1.48     | 6.77                  |
| 20 | 26.39 | 12.72              | 2.97     | 6.88                  |
| 21 | 17.97 | 15.18              | 1.96     | 6.94                  |
| 22 | 26.80 | 14.39              | 3.82     | 6.88                  |
| 23 | 12.51 | 10.35              | 2.30     | 6.88                  |
| 24 | 27.14 | 22.27              | 1.71     | 7.00                  |
| 25 | 20.75 | 9.31               | 4.00     | 6.84                  |
| 26 | 10.38 | 12.74              | 2.64     | 6.65                  |
| 27 | 26.58 | 11.27              | 1.60     | 6.84                  |
| 28 | 16.57 | 12.62              | 2.00     | 6.80                  |
| 29 | 13.72 | 11.35              | 1.75     | 6.78                  |
| 30 | 5.68  | 9.67               | 2.63     | 6.67                  |

V, volume of central compartment distribution; V<sub>2</sub>, volume of peripheral compartment distribution; Cl, central compartment clearance; Cl<sub>2</sub>, inter-compartmental clearance.

**Table S7.** The predictive performance of the validated LSSs from the published literature following the simulation under infusion time of 0.5 h, 1.5 h, 2 h<sub>s</sub> and 2.5 h.

| No. | Time point                                                          | Reference | MPE % |       |       |       |       | RMSE % |       |       |       |       |
|-----|---------------------------------------------------------------------|-----------|-------|-------|-------|-------|-------|--------|-------|-------|-------|-------|
|     |                                                                     |           | 0.5 h | 1 h   | 1.5 h | 2 h   | 2.5 h | 0.5 h  | 1 h   | 1.5 h | 2 h   | 2.5 h |
| 3   | C <sub>4</sub>                                                      | [22]      | -5.92 | -6.64 | -0.79 | 2.36  | 6.19  | 19.44  | 12.54 | 19.59 | 20.36 | 21.94 |
| 5   | C <sub>6</sub>                                                      | [21]      | 4.77  | 3.71  | 8.53  | 10.56 | 12.73 | 20.28  | 11.57 | 22.32 | 23.61 | 25.12 |
| 8*  | C <sub>0</sub> , C <sub>1</sub>                                     | [21]      | 3.89  | 6.18  | 0.18  | -4.53 | -6.86 | 17.92  | 15.36 | 16.42 | 15.96 | 16.53 |
| 9   | C <sub>0</sub> , C <sub>1.5</sub>                                   | [21]      | 5.04  | 6.04  | 15.52 | 8.33  | 4.51  | 19.05  | 14.36 | 26.31 | 20.65 | 18.47 |
| 10  | C <sub>0</sub> , C <sub>2</sub>                                     | [22]      | -0.76 | 0.78  | 11.52 | 22.84 | 9.79  | 17.97  | 15.19 | 23.83 | 35.48 | 23.77 |
| 11  | C <sub>0</sub> , C <sub>2</sub>                                     | [21]      | 1.76  | -2.52 | 12.26 | 21.79 | 11.23 | 17.69  | 11.22 | 23.59 | 33.10 | 23.47 |
| 12  | C <sub>0</sub> , C <sub>4</sub>                                     | [22]      | -0.79 | -1.55 | 3.97  | 6.82  | 10.20 | 18.46  | 11.36 | 19.64 | 20.84 | 22.67 |
| 13* | C <sub>0</sub> , C <sub>4</sub>                                     | [21]      | -8.63 | -9.39 | -3.72 | -0.77 | 2.75  | 20.20  | 14.87 | 19.20 | 19.18 | 19.74 |
| 14  | C <sub>0</sub> , C <sub>6</sub>                                     | [22]      | 5.43  | 4.42  | 9.02  | 10.96 | 13.01 | 20.41  | 12.68 | 22.38 | 23.62 | 25.05 |
| 15  | C <sub>2</sub> , C <sub>8</sub>                                     | [22]      | 2.31  | 0.14  | 12.69 | 21.82 | 12.62 | 18.83  | 10.78 | 23.93 | 32.34 | 24.13 |
| 16  | C <sub>4</sub> , C <sub>6</sub>                                     | [21]      | -3.38 | -4.34 | 1.14  | 3.74  | 6.73  | 18.92  | 9.48  | 19.48 | 20.27 | 21.53 |
| 17  | C <sub>4</sub> , C <sub>8</sub>                                     | [21]      | -3.03 | -5.93 | 1.90  | 4.81  | 8.22  | 19.32  | 10.24 | 19.85 | 20.72 | 22.17 |
| 18* | C <sub>4</sub> , C <sub>12</sub>                                    | [21]      | -5.87 | -5.33 | -1.16 | 1.63  | 4.93  | 19.06  | 11.42 | 18.59 | 18.86 | 19.67 |
| 19* | C <sub>1</sub> , C <sub>4</sub> , C <sub>8</sub>                    | [22]      | 0.39  | -1.99 | 2.54  | 2.92  | 4.48  | 18.02  | 4.68  | 18.45 | 18.79 | 19.46 |
| 20  | C <sub>1.5</sub> , C <sub>4</sub> , C <sub>8</sub>                  | [22]      | 2.56  | 0.13  | 12.38 | 8.37  | 7.06  | 18.56  | 3.63  | 23.35 | 20.67 | 20.04 |
| 21  | C <sub>0</sub> , C <sub>4</sub> , C <sub>6</sub>                    | [21]      | -2.29 | -3.21 | 2.03  | 4.51  | 7.34  | 18.47  | 9.84  | 19.20 | 20.04 | 21.30 |
| 22  | C <sub>0</sub> , C <sub>6</sub> , C <sub>8</sub>                    | [21]      | 3.94  | 3.01  | 7.67  | 9.68  | 11.82 | 19.70  | 11.32 | 21.52 | 22.72 | 24.13 |
| 23  | C <sub>4</sub> , C <sub>6</sub> , C <sub>12</sub>                   | [21]      | -2.92 | -3.00 | 1.51  | 4.08  | 7.03  | 18.39  | 9.16  | 18.85 | 19.57 | 20.75 |
| 24* | C <sub>1</sub> , C <sub>1.5</sub> , C <sub>4</sub> , C <sub>8</sub> | [22]      | 0.50  | -1.84 | 6.83  | 4.42  | 4.15  | 18.06  | 4.26  | 19.88 | 18.88 | 18.92 |
| 25  | C <sub>0</sub> , C <sub>4</sub> , C <sub>6</sub> , C <sub>8</sub>   | [21]      | -1.90 | -3.25 | 2.48  | 4.98  | 7.83  | 18.67  | 9.27  | 19.47 | 20.34 | 21.64 |
| 26  | C <sub>0</sub> , C <sub>4</sub> , C <sub>6</sub> , C <sub>12</sub>  | [21]      | -2.26 | -2.59 | 2.06  | 4.54  | 7.39  | 18.26  | 9.30  | 18.88 | 19.66 | 20.88 |

MPE, mean prediction error; RMSE, root mean squared prediction error. \*Equation with the best predictability within the same numbers of concentration-time points.

Table S7. (Continued)

| No. | Time point                                                          | Reference | R     |       |       |       |       | F <sub>15</sub> % |        |       |       |       |
|-----|---------------------------------------------------------------------|-----------|-------|-------|-------|-------|-------|-------------------|--------|-------|-------|-------|
|     |                                                                     |           | 0.5 h | 1 h   | 1.5 h | 2 h   | 2.5 h | 0.5 h             | 1 h    | 1.5 h | 2 h   | 2.5 h |
| 3   | C <sub>4</sub>                                                      | [22]      | 0.937 | 0.976 | 0.936 | 0.936 | 0.935 | 76.67             | 76.67  | 83.33 | 73.33 | 83.33 |
| 5   | C <sub>6</sub>                                                      | [21]      | 0.939 | 0.993 | 0.939 | 0.939 | 0.939 | 80.00             | 90.00  | 73.33 | 76.67 | 70.00 |
| 8*  | C <sub>0</sub> , C <sub>1</sub>                                     | [21]      | 0.950 | 0.986 | 0.952 | 0.950 | 0.947 | 76.67             | 73.33  | 76.67 | 73.33 | 63.33 |
| 9   | C <sub>0</sub> , C <sub>1.5</sub>                                   | [21]      | 0.946 | 0.980 | 0.953 | 0.952 | 0.950 | 76.67             | 73.33  | 63.33 | 63.33 | 76.67 |
| 10  | C <sub>0</sub> , C <sub>2</sub>                                     | [22]      | 0.948 | 0.976 | 0.944 | 0.930 | 0.941 | 83.33             | 76.67  | 76.67 | 66.67 | 76.67 |
| 11  | C <sub>0</sub> , C <sub>2</sub>                                     | [21]      | 0.949 | 0.978 | 0.948 | 0.940 | 0.948 | 83.33             | 83.33  | 73.33 | 80.00 | 73.33 |
| 12  | C <sub>0</sub> , C <sub>4</sub>                                     | [22]      | 0.943 | 0.979 | 0.944 | 0.944 | 0.944 | 80.00             | 90.00  | 80.00 | 83.33 | 80.00 |
| 13* | C <sub>0</sub> , C <sub>4</sub>                                     | [21]      | 0.942 | 0.979 | 0.943 | 0.943 | 0.943 | 73.33             | 73.33  | 80.00 | 73.33 | 83.33 |
| 14  | C <sub>0</sub> , C <sub>6</sub>                                     | [22]      | 0.939 | 0.988 | 0.940 | 0.940 | 0.941 | 80.00             | 83.33  | 73.33 | 56.67 | 66.67 |
| 15  | C <sub>2</sub> , C <sub>8</sub>                                     | [22]      | 0.947 | 0.991 | 0.946 | 0.940 | 0.946 | 83.33             | 86.67  | 80.00 | 80.00 | 76.67 |
| 16  | C <sub>4</sub> , C <sub>6</sub>                                     | [21]      | 0.940 | 0.991 | 0.940 | 0.940 | 0.940 | 80.00             | 90.00  | 80.00 | 80.00 | 80.00 |
| 17  | C <sub>4</sub> , C <sub>8</sub>                                     | [21]      | 0.942 | 0.993 | 0.942 | 0.942 | 0.942 | 76.67             | 86.67  | 83.33 | 83.33 | 80.00 |
| 18* | C <sub>4</sub> , C <sub>12</sub>                                    | [21]      | 0.945 | 0.987 | 0.946 | 0.947 | 0.948 | 73.33             | 83.33  | 76.67 | 83.33 | 83.33 |
| 19* | C <sub>1</sub> , C <sub>4</sub> , C <sub>8</sub>                    | [22]      | 0.946 | 0.998 | 0.947 | 0.946 | 0.946 | 83.33             | 96.67  | 83.33 | 83.33 | 80.00 |
| 20  | C <sub>1.5</sub> , C <sub>4</sub> , C <sub>8</sub>                  | [22]      | 0.946 | 0.997 | 0.948 | 0.948 | 0.948 | 83.33             | 100.00 | 80.00 | 80.00 | 83.33 |
| 21  | C <sub>0</sub> , C <sub>4</sub> , C <sub>6</sub>                    | [21]      | 0.941 | 0.988 | 0.942 | 0.942 | 0.942 | 73.33             | 90.00  | 80.00 | 73.33 | 80.00 |
| 22  | C <sub>0</sub> , C <sub>6</sub> , C <sub>8</sub>                    | [21]      | 0.939 | 0.990 | 0.940 | 0.940 | 0.940 | 76.67             | 83.33  | 76.67 | 80.00 | 73.33 |
| 23  | C <sub>4</sub> , C <sub>6</sub> , C <sub>12</sub>                   | [21]      | 0.943 | 0.991 | 0.944 | 0.945 | 0.945 | 73.33             | 93.33  | 80.00 | 86.67 | 80.00 |
| 24* | C <sub>1</sub> , C <sub>1.5</sub> , C <sub>4</sub> , C <sub>8</sub> | [22]      | 0.946 | 0.998 | 0.948 | 0.948 | 0.947 | 83.33             | 100.00 | 86.67 | 80.00 | 86.67 |
| 25  | C <sub>0</sub> , C <sub>4</sub> , C <sub>6</sub> , C <sub>8</sub>   | [21]      | 0.941 | 0.991 | 0.942 | 0.942 | 0.942 | 73.33             | 90.00  | 80.00 | 80.00 | 80.00 |
| 26  | C <sub>0</sub> , C <sub>4</sub> , C <sub>6</sub> , C <sub>12</sub>  | [21]      | 0.942 | 0.990 | 0.944 | 0.944 | 0.945 | 70.00             | 90.00  | 80.00 | 80.00 | 80.00 |

R, the Pearson correlation coefficient between AUC<sub>pred</sub> and AUC<sub>obs</sub>; F<sub>15</sub>, the percentage of prediction error falling within the  $\pm 15$  %. \*Equation with the best predictability within the same numbers of concentration-time points.



**Table S8.** The predictive performance of the LSSs ( $C_0$ ,  $C_1$ ) that were established by our center following the sampling time error of 0,  $\pm 5$ ,  $\pm 10$ ,  $\pm 15$ ,  $\pm 20$ ,  $\pm 25$ , and  $\pm 30$ min.

| Sampling error time (min) | MPE %  | RMSE % | R     | F <sub>15</sub> % |
|---------------------------|--------|--------|-------|-------------------|
| -30                       | -15.58 | 18.09  | 0.985 | 50.00             |
| -25                       | -12.63 | 15.53  | 0.986 | 76.67             |
| -20                       | -9.51  | 13.13  | 0.987 | 80.00             |
| -15                       | -6.87  | 11.52  | 0.988 | 86.67             |
| -10                       | -4.35  | 10.48  | 0.988 | 90.00             |
| -5                        | -1.92  | 10.07  | 0.988 | 90.00             |
| 0                         | 1.46   | 8.57   | 0.988 | 90.00             |
| 5                         | -1.56  | 9.31   | 0.989 | 93.33             |
| 10                        | -3.68  | 9.44   | 0.988 | 90.00             |
| 15                        | -5.39  | 10.28  | 0.986 | 90.00             |
| 20                        | -6.93  | 11.44  | 0.984 | 86.67             |
| 25                        | -8.47  | 12.87  | 0.982 | 76.67             |
| 30                        | -9.70  | 14.13  | 0.980 | 76.67             |

MPE, mean prediction error; RMSE, root mean squared prediction error; R, the Pearson correlation coefficient between  $AUC_{pred}$  and  $AUC_{obs}$ ; F<sub>15</sub>, the percentage of prediction error falling within the  $\pm 15$  %.
